# Supplementary material for: Greatly enhanced dielectric charge storage capabilities of layered polymer composites incorporated with low loading fractions of ultrathin amorphous iron phosphate nanosheets
Source: Royal Society of Chemistry journal article supplement (doi:10.1039/d1tc01974k), 2021-01-01
Supplement: d1tc01974k1.pdf [file d1tc01974k1.pdf]

*Supporting information for*

**Greatly Enhanced Dielectric Charge Storage Capabilities of Layered  
Polymer Composites Incorporated with low loading fractions of  
Ultrathin Amorphous Iron Phosphate Nanosheets**

Meiyu Zhang<sup>a</sup>, Zhicheng Shi<sup>a, \*</sup>, Jifu Zhang<sup>a</sup>, Kun Zhang<sup>b</sup>, Li Lei<sup>a</sup>, Davoud Dastan<sup>c</sup>,  
Bohua Dong<sup>a, \*</sup>

<sup>a</sup>School of Materials Science and Engineering, Ocean University of China, Qingdao  
266100, P. R. China

<sup>b</sup>Key Laboratory of Microgravity (National Microgravity Laboratory), Institute of  
Mechanics, Chinese Academy of Sciences, Beijing 100190, China

<sup>c</sup>Department of Materials Science and Engineering, Georgia Institute of Technology,  
Atlanta, Georgia-30332, USA

\*Corresponding author: E-mail: zcshi@ouc.edu.cn; dongbohua@ouc.edu.cn

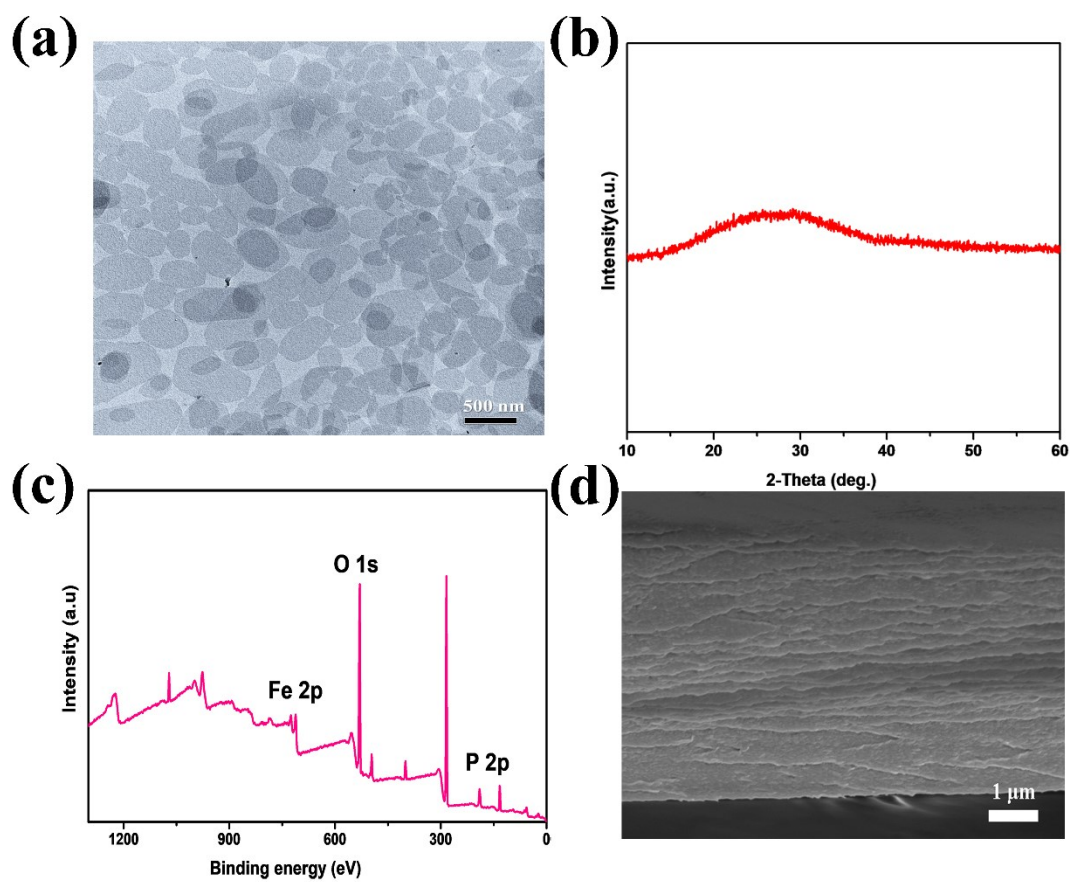

**Fig. S1** (a) TEM images of amorphous  $\text{FePO}_4$  nanosheets, (b) The wide-angle XRD pattern of amorphous  $\text{FePO}_4$  nanosheets, (c) XPS spectrum of  $\text{FePO}_4$  nanosheets showing the composition of both Fe, P and O, (d) Cross-sectional SEM morphology of PEI film.

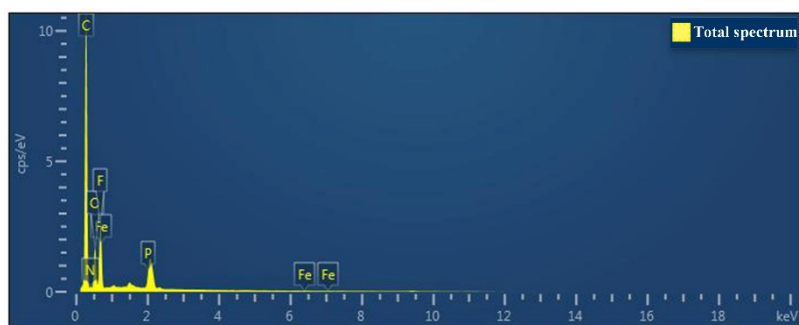

**Fig. S2** Total spectrum

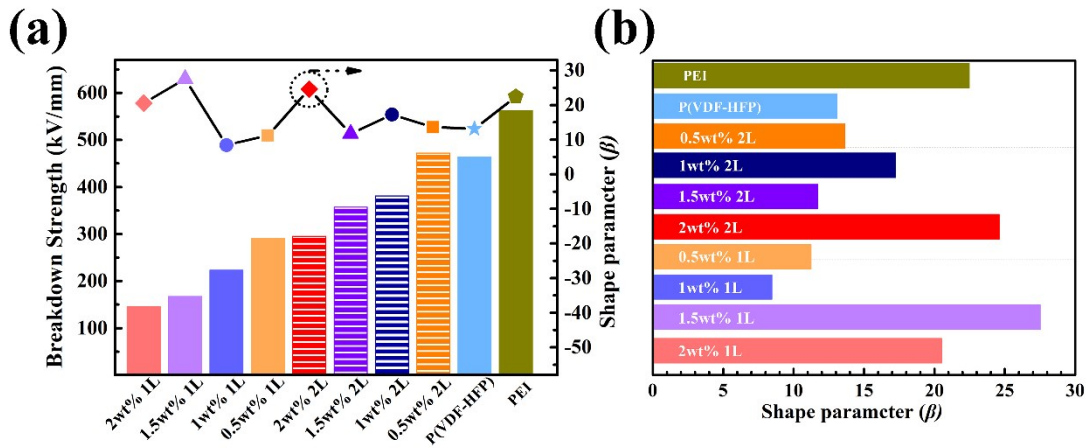

**Fig. S3** (a) Comparison of the breakdown strength and shape parameters  $\beta$  of single-layer and bilayer composites with different  $\text{FePO}_4$  mass fractions, (b) Horizontal comparison of the shape parameters  $\beta$  of single-layer and bilayer composites with different  $\text{FePO}_4$  mass fractions.

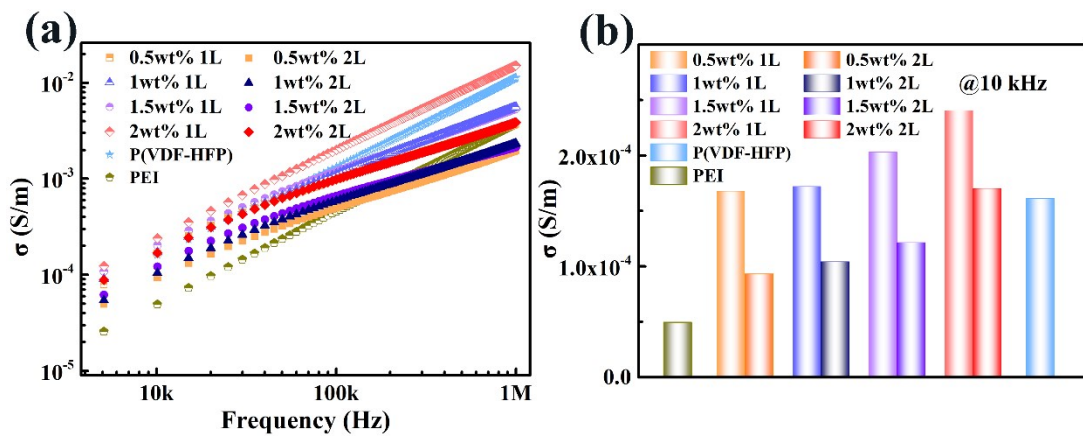

**Fig. S4** (a) The frequency dependence of the electrical conductivity of single-layer and bilayer composites, (b) The electrical conductivity of single-layer and bilayer composites with different  $\text{FePO}_4$  loading fractions.

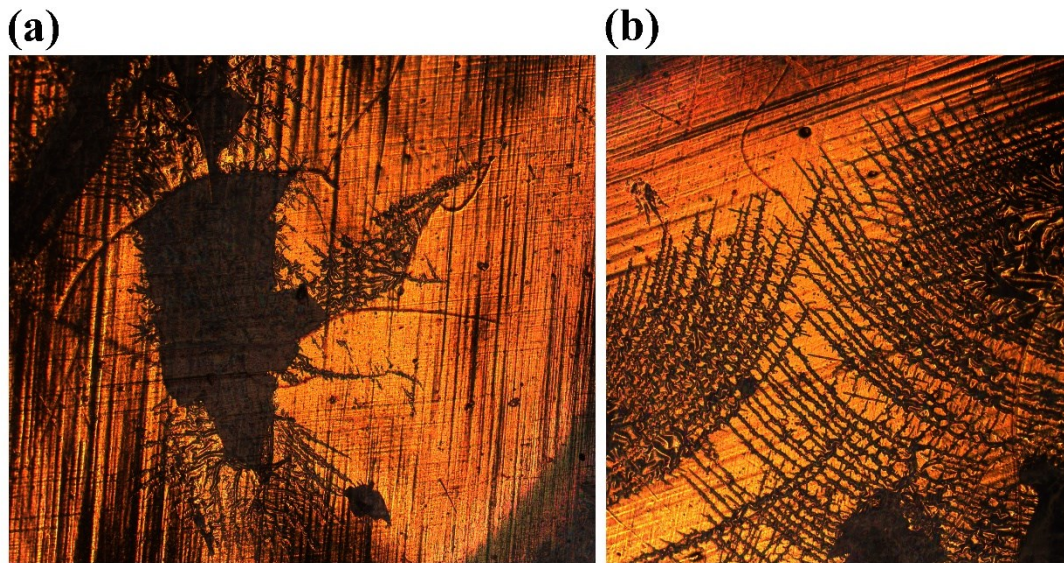

**Fig. S5** Observe electrical tree branches (a) on the surface of the sample after breakdown under a metallographic microscope, (b) The picture shows a partial enlargement of the electrical tree.

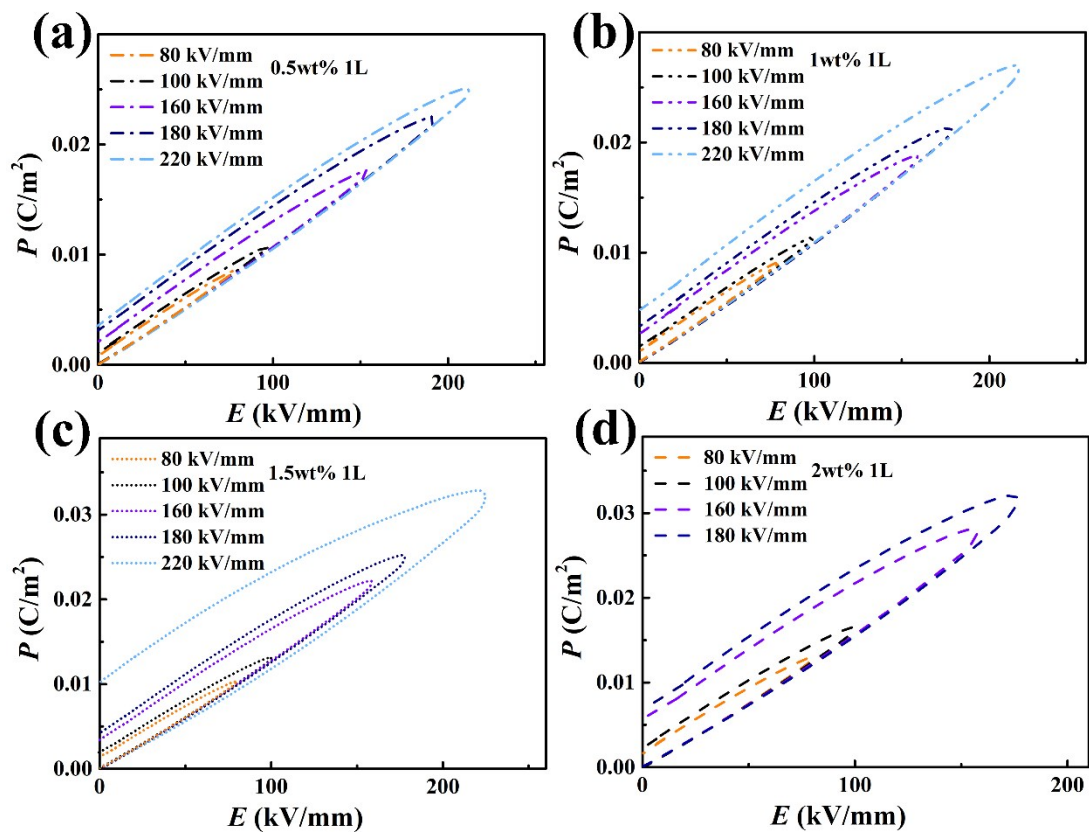

**Fig. S6**  $P$ - $E$  loops of  $\text{FePO}_4/\text{P}(\text{VDF-HFP})$  single-layer films with different  $\text{FePO}_4$  mass fraction ratios.

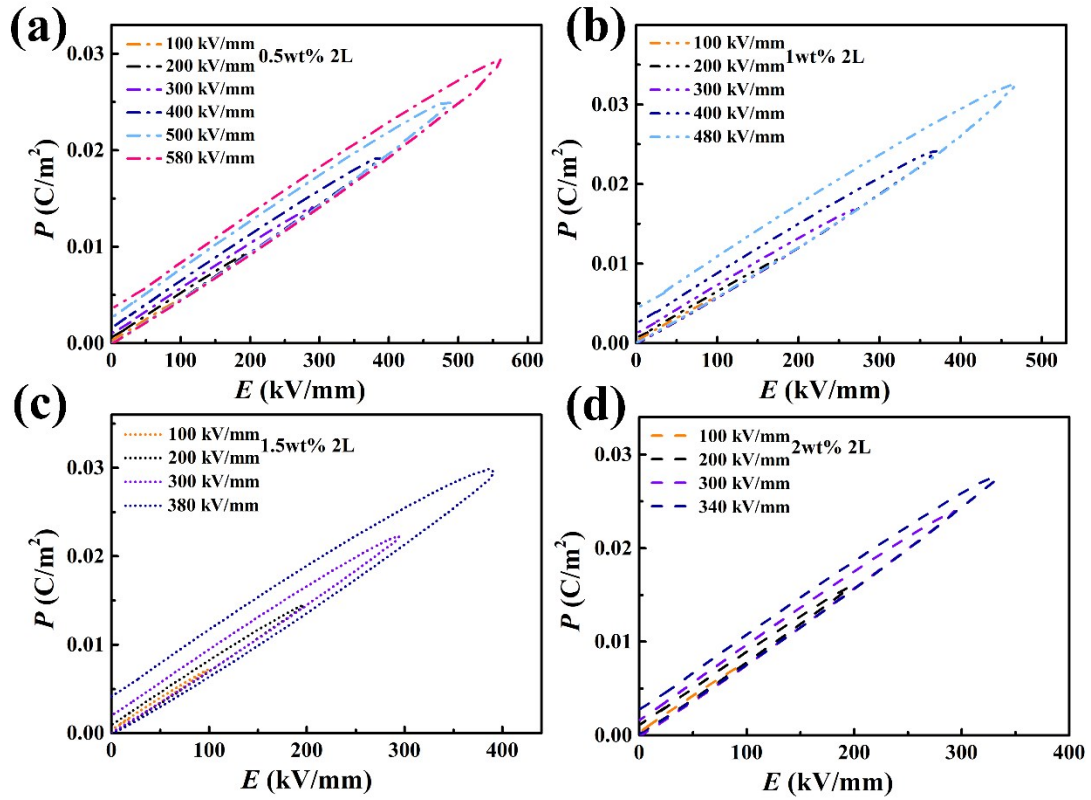

**Fig. S7**  $P$ - $E$  loops of  $\text{FePO}_4/\text{P}(\text{VDF-HFP})$ -PEI bilayer films with different  $\text{FePO}_4$  mass fraction ratios.

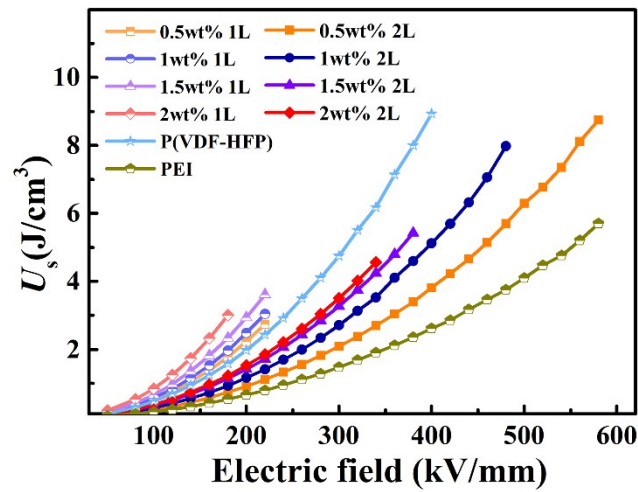

**Fig. S8** The stored energy densities of the single layer and bilayer composites under varied external electric fields.

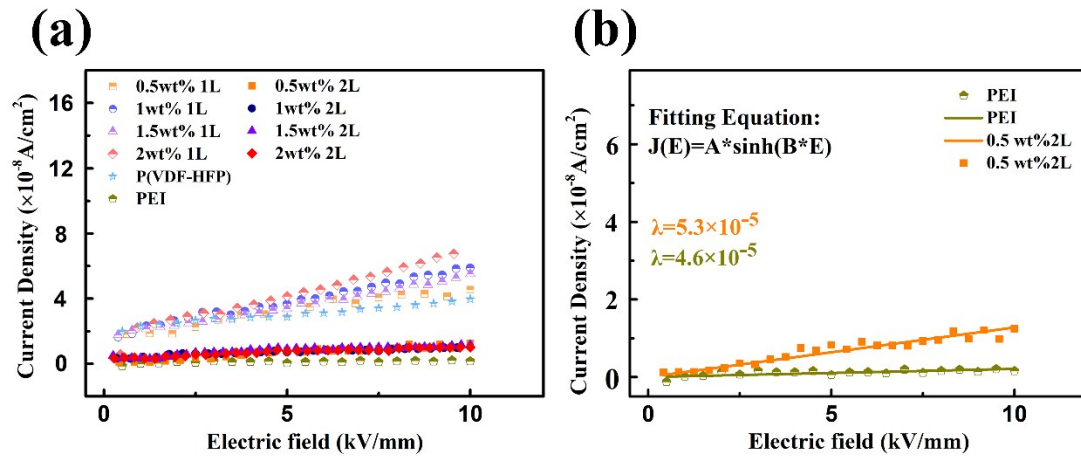

**Fig. S9** (a) The variation of leakage current for 1L and 2L composite films with different filling fraction of  $\text{FePO}_4$  nanosheets, (b) The leakage current density of PEI and 0.5 wt% 2L nanocomposite as a function of electric field at room temperature. The solid line represents the fit performed by the jump conduction equation.

The  $J$ - $E$  curves are fitted using a hopping conduction model:<sup>S1, S2</sup>

$$J(E, T) = 2ne\lambda v * \exp(-W_a/K_B T) * \sinh(\lambda eE/2K_B T) \quad (\text{S1})$$

where  $J$  is the leakage current,  $n$  is the carrier concentration,  $e$  is the charge of the carriers,  $\lambda$  is the hopping distance,  $v$  is the attempt-to-escape frequency,  $W_a$  is the activation energy, and  $K_B$  is the Boltzmann constant. At a fixed temperature, equation (S1) can be simplified as:

$$J(E) = A * \sinh(B * E) \quad (\text{S2})$$

where  $A$  and  $B$  are two lumped parameters. The fitted results are shown in **Fig. S9**.

## References

- S1 H. Li, D. Ai, L. L. Ren, B. Yao, Z. B. Han, Z. H. Shen, J. J. Wang, L. Q. Chen and Q. Wang, *Adv. Mater.*, 2019, **31**, 1900875.
- S2 L. L. Ren, H. Li, Z. L. Xie, D. Ai, Y. Zhou, Y. Liu, S. Y. Zhang, L. J. Yang, X. T. Zhao, Z. R. Peng, R. J. Liao and Q. Wang, *Adv. Energy Mater.*, 2021, <https://doi.org/10.1002/aenm.202101297>.
